# Supplementary material for: Differential regulation of the androgen receptor by protein phosphatase regulatory subunits
Source: PubMed Central journal article supplement (PMC5790511; doi:10.18632/oncotarget.22883), 2017-12-04
Supplement: oncotarget-09-3922-s001.pdf [file oncotarget-09-3922-s001.pdf]

## Differential regulation of the androgen receptor by protein phosphatase regulatory subunits

### SUPPLEMENTARY MATERIALS

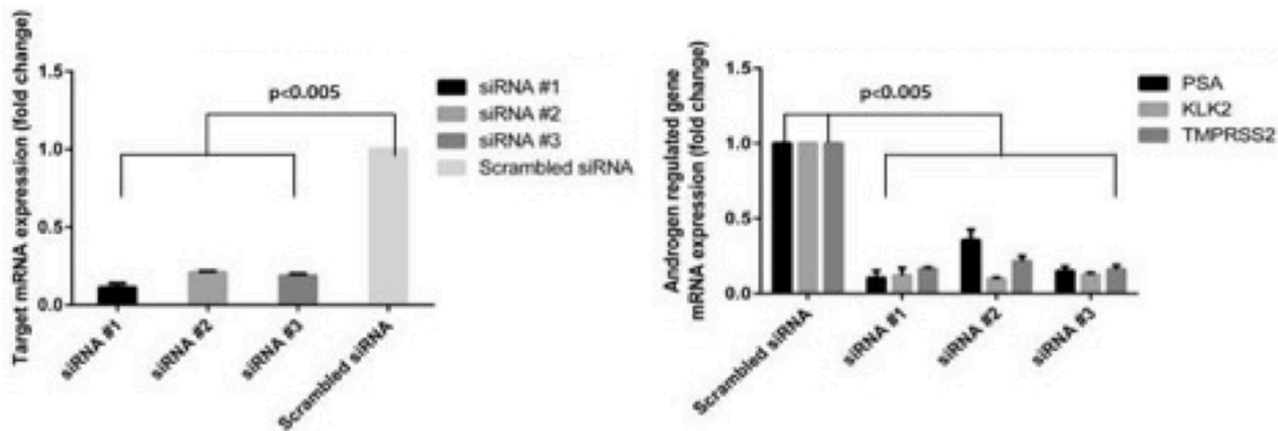

Supplementary Figure 1: PPP1R14C RNAi depletion with 3 independent RNAi oligos results in significant reduction of *PPP1R14C* and AR target gene expression.

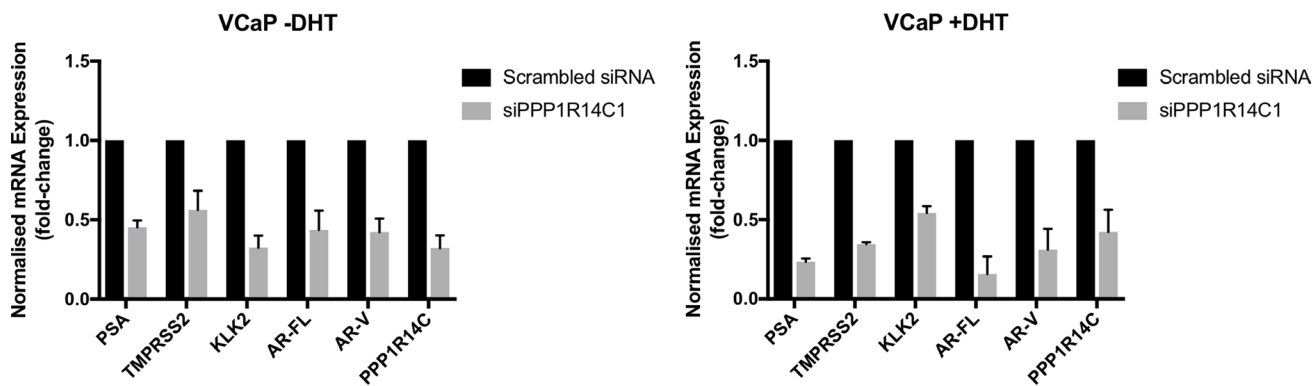

Supplementary Figure 2: PPP1R14C RNAi depletion reduces AR activity in both the presence and absence of androgens in VCaP cells.

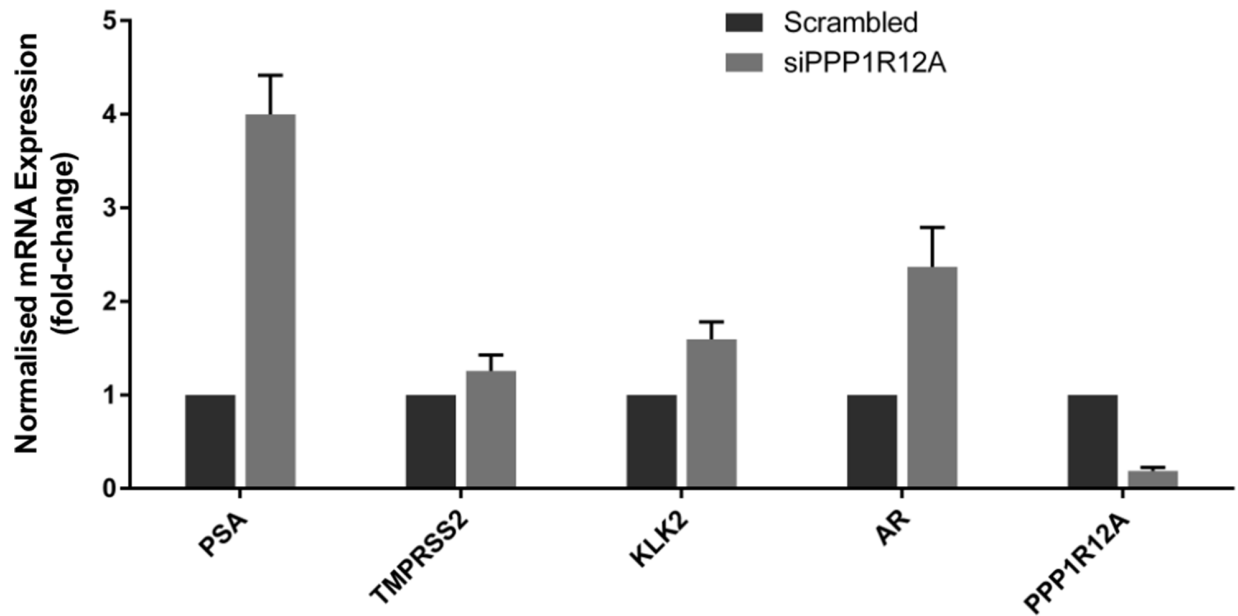

Supplementary Figure 3: PPP1R12A RNAi depletion increases *AR* and *AR* target gene expression in LNCaP cells in the presence of androgen.

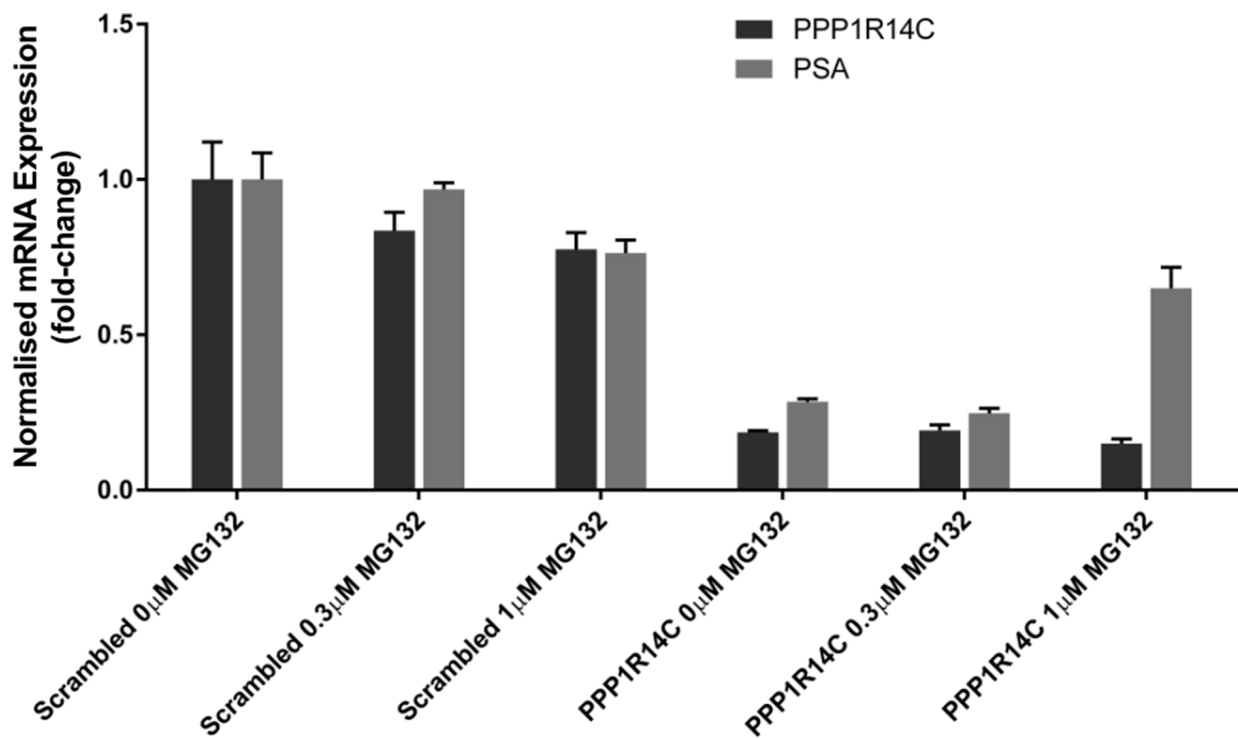

Supplementary Figure 4: PPP1R14C RNAi depletion in the presence of the proteasomal inhibitor MG132 rescues *AR* transcriptional activity.

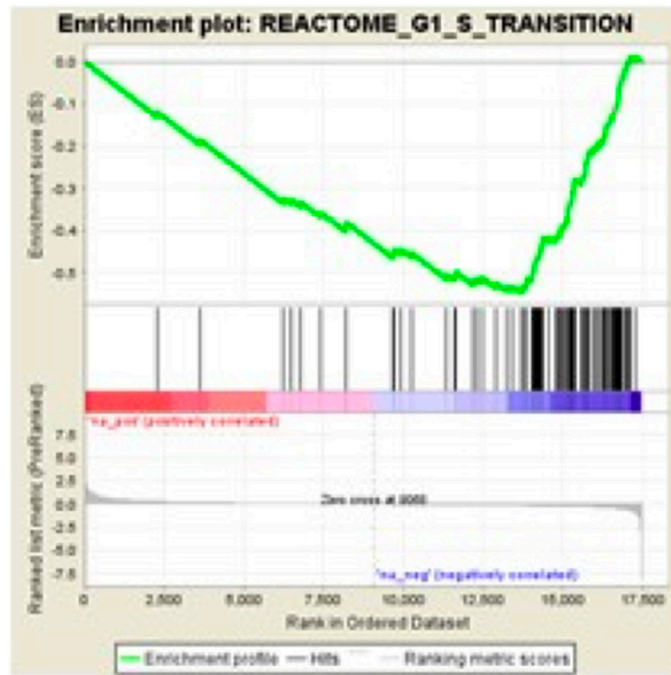

| Gene Set                          | REACTOME<br>G1 S<br>TRANSITION |
|-----------------------------------|--------------------------------|
| Enrichment Score (ES)             | -0.5478876                     |
| Normalized Enrichment Score (NES) | -6.056714                      |
| Nominal p-value                   | <0.001                         |
| FDR q-value                       | <0.001                         |

Supplementary Figure 5: PPP1R14C RNAi depletion results in significant reduction in the expression of genes associated with G1-S transition.

Supplementary Table 1: Key resources table. See Supplementary\_Table\_1
